# Supplementary material
Source: Springer Nature journal article supplement (https://www.springermedizin.de/resource/supplementary/12943_2010_800_MOESM3_ESM.pdf/9554874)
Supplement: MOESM3 [file 9554874]

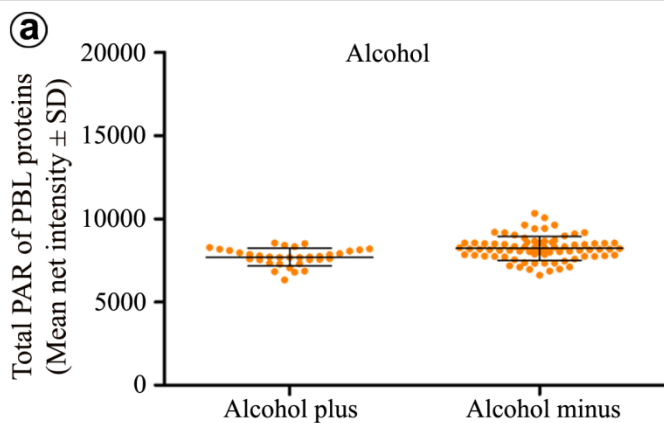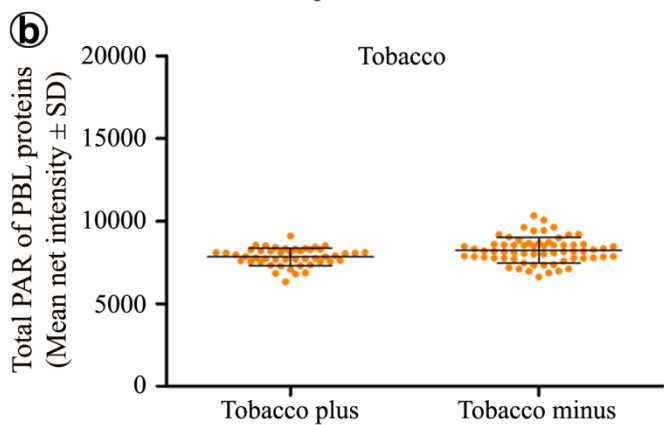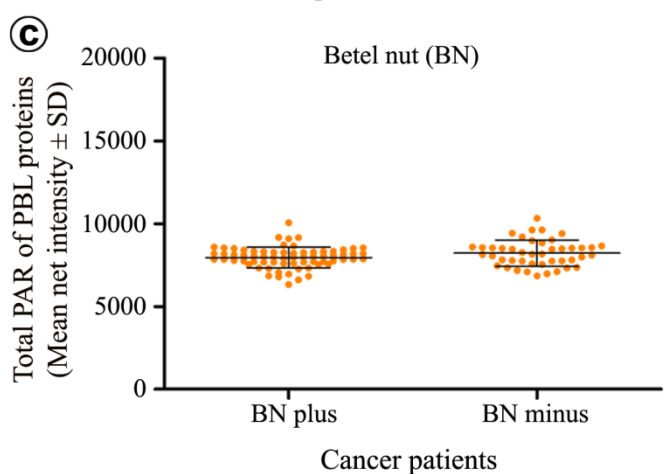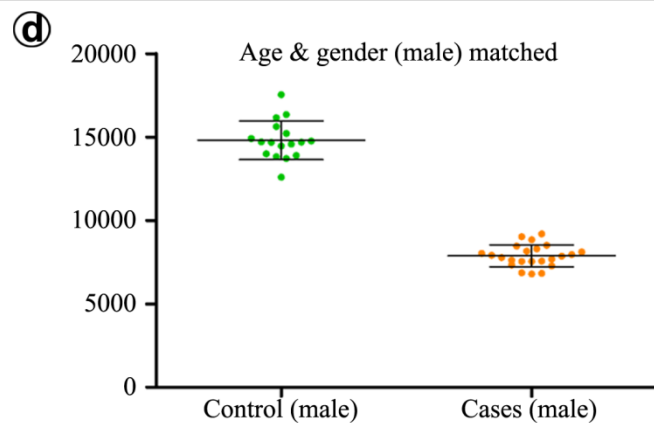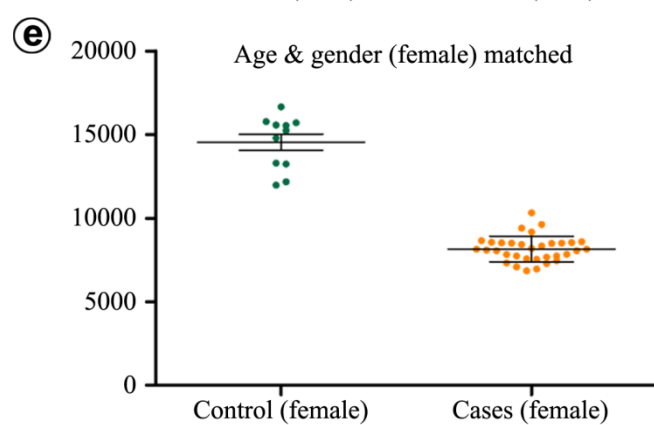

| Gender | PAR of PBL proteins in age-matched subjects<br>mean $\pm$ SD |                            | P*      |
|--------|--------------------------------------------------------------|----------------------------|---------|
|        | Control                                                      | Cancer                     |         |
| Male   | 14803 $\pm$ 1154<br>(n = 17)                                 | 7874 $\pm$ 657<br>(n = 23) | <0.0001 |
| Female | 14543 $\pm$ 1595<br>(n = 11)                                 | 8159 $\pm$ 760<br>(n = 33) | <0.0001 |
